# Supplementary material
Source: PubMed Central journal article supplement (PMC7424896)
Supplement: cir-142-708-s001.pdf [file cir-142-708-s001.pdf]

### HCA Lung Biological Network Consortium Members

| First name    | Last name  | Affiliation                                                                                                                                                                                                               |
|---------------|------------|---------------------------------------------------------------------------------------------------------------------------------------------------------------------------------------------------------------------------|
| Nicholas E.   | Banovich   | Translational Genomics Research Institute, Phoenix, AZ.                                                                                                                                                                   |
| Pascal        | Barbry     | Université Côte d'Azur, CNRS, IPMC, Sophia-Antipolis, 06560, France                                                                                                                                                       |
| Katharine E.  | Black      | Center for Immunology and Inflammatory Diseases, Massachusetts General Hospital, Boston, MA 02114                                                                                                                         |
| Alvis         | Brazma     | European Molecular Biology Laboratory, European Bioinformatics Institute (EMBL-EBI), Wellcome Trust Genome Campus, Hinxton, Cambridge, CB10 1SD, UK                                                                       |
| Joseph        | Collin     | Biosciences Institute, Faculty of Medical Sciences, Newcastle University, International Centre for Life, Bioscience West Building, Newcastle upon Tyne NE1 3 BZ, UK                                                       |
| Christian     | Conrad     | Charité - Universitätsmedizin Berlin, corporate member of Freie Universität Berlin, Humboldt-Universität zu Berlin, and Berlin Institute of Health, Charitéplatz 1, 10117 Berlin, Germany                                 |
| Tushar        | Desai      | Department of Medicine and Institute for Stem Cell Biology and Regenerative Medicine, Stanford University School of Medicine, Stanford, CA 94116                                                                          |
| Thu Elizabeth | Duong      | University of California San Diego and Rady Children's Hospital San Diego, Department of Pediatrics Division of Respiratory Medicine                                                                                      |
| Oliver        | Eickelberg | Division of Pulmonary Sciences and Critical Care Medicine, Department of Medicine, University of Colorado, Anschutz Medical Campus, Aurora, CO, US                                                                        |
| Roland        | Eils       | Charité - Universitätsmedizin Berlin, corporate member of Freie Universität Berlin, Humboldt-Universität zu Berlin, and Berlin Institute of Health, Charitéplatz 1, 10117 Berlin, Germany                                 |
| Alen          | Faiz       | Respiratory Bioinformatics and Molecular Biology, University of Technology Sydney, Sydney, New South Wales, Australia.                                                                                                    |
| Christine     | Falk       | Institute of Transplant Immunology, Hannover Medical School, MHH, Carl-Neuberg Str. 1, 30625 Hannover, Germany, phone +40 511 532 9745; fax +40 511 532 8090; German Center for Infectious Diseases DZIF, TTU-IICH 07.801 |
| Michael       | Farzan     | Department of Immunology and Microbiology, The Scripps Research Institute, Jupiter, Florida, USA (33458)                                                                                                                  |
| Ian           | Glass      | Department of Pediatrics, Genetic Medicine, University of Washington, Seattle, Washington;                                                                                                                                |

|             |           |                                                                                                                                                                                                                                                                                                                                                        |
|-------------|-----------|--------------------------------------------------------------------------------------------------------------------------------------------------------------------------------------------------------------------------------------------------------------------------------------------------------------------------------------------------------|
| Muzlifa     | Haniffa   | Wellcome Sanger Institute, Wellcome Genome Campus, Hinxton, Cambridge CB10 1SA, UK; Biosciences Institute, Faculty of Medical Sciences, Newcastle University, Newcastle upon Tyne NE2 4HH, UK; Department of Dermatology and NIHR Newcastle Biomedical Research Centre, Newcastle Hospitals NHS Foundation Trust, Newcastle upon Tyne NE2 4LP, UK.     |
| Peter       | Horvath   | Synthetic and Systems Biology Unit, Biological Research Centre (BRC), Szeged, Hungary; Institute for Molecular Medicine Finland, University of Helsinki                                                                                                                                                                                                |
| Norbert     | Hubner    | Cardiovascular and Metabolic Sciences, Max Delbrück Center for Molecular Medicine in the Helmholtz Association (MDC), 13125 Berlin, Germany; DZHK (German Centre for Cardiovascular Research), Partner Site Berlin, 13347 Berlin, Germany; Berlin Institute of Health (BIH), 10178 Berlin, Germany; Charité-Universitätsmedizin, 10117 Berlin, Germany |
| Deborah     | Hung      | Professor of Genetics, Department of Genetics at Harvard Medical School and Department of Molecular Biology at Massachusetts General Hospital; Co-Director, Infectious Disease and Microbiome Program and Core Faculty Member, Broad Institute of MIT & Harvard                                                                                        |
| Naftali     | Kaminski  | Pulmonary, Critical Care and Sleep Medicine, Yale University School of Medicine                                                                                                                                                                                                                                                                        |
| Gerard      | Koppelman | Department of Pediatric Pulmonology and Pediatric Allergology, Beatrix Children's Hospital, University of Groningen, University Medical Center Groningen (UMCG), Groningen Research Institute for Asthma and COPD, Groningen, Netherlands                                                                                                              |
| Mark        | Krasnow   | Department of Biochemistry and Wall Center for Pulmonary Vascular Disease                                                                                                                                                                                                                                                                              |
| Jonathan A. | Kropski   | Division of Allergy, Pulmonary and Critical Care Medicine, Department of Medicine, Vanderbilt University Medical Center, Nashville, TN; Department of Veterans Affairs Medical Center, Nashville, TN; Department of Cell and Developmental Biology, Vanderbilt University, Nashville, TN                                                               |
| Malte       | Kuhnemund | Cartana AB, Nobels vag 16, 17165 Stockholm, Sweden                                                                                                                                                                                                                                                                                                     |
| Robert      | Lafyatis  | Division of Rheumatology, Department of Medicine, University of Pittsburgh Medical Center, Pittsburgh, PA, USA.                                                                                                                                                                                                                                        |
| Majlinda    | Lako      | Biosciences Institute, Faculty of Medical Sciences, Newcastle University, International Centre for Life, Bioscience West Building, Newcastle upon Tyne NE1 3 BZ, UK                                                                                                                                                                                    |

|           |                  |                                                                                                                                                                                                                                                    |
|-----------|------------------|----------------------------------------------------------------------------------------------------------------------------------------------------------------------------------------------------------------------------------------------------|
| Haeock    | Lee              | Department of Biomedicine and Health Sciences, The Catholic University of Korea, Seoul, Korea                                                                                                                                                      |
| Sylvie    | Leroy            | Université Côte d'Azur, CHU de Nice, FHU OncoAge, Department of Pulmonary Medicine and Allergology, Nice, France ; CNRS UMR 7275 - Institut de Pharmacologie Moléculaire et Cellulaire, Sophia Antipolis, France                                   |
| Sten      | Linnarson        | Division of Molecular Neurobiology, Department of Medical Biochemistry and Biophysics, Karolinska Institute                                                                                                                                        |
| Joakim    | Lundeberg        | SciLifeLab, Department of Gene Technology, KTH Royal Institute of Technology                                                                                                                                                                       |
| Benjamin  | Medoff           | Center for Immunology and Inflammatory Diseases, Massachusetts General Hospital, Boston, MA 02114                                                                                                                                                  |
| Kerstin   | Meyer            | Wellcome Sanger Institute, Wellcome Genome Campus, Hinxton, Cambridge, UK                                                                                                                                                                          |
| Chichau   | Miao             | Wellcome Sanger Institute, Wellcome Genome Campus, Hinxton, Cambridge CB10 1SA, UK                                                                                                                                                                 |
| Alexander | Misharin         | Division of Pulmonary and Critical Care Medicine, Northwestern University, Chicago, Illinois                                                                                                                                                       |
| Martijn   | Nawijn           | Department of Pathology and Medical Biology, University of Groningen, GRIAC Research institue, University Medical Center Groningen, the Netherlands                                                                                                |
| Marko     | Nikolic          | UCL Respiratory, Division of Medicine, University College London, London, UK                                                                                                                                                                       |
| Michela   | Nosedà           | National Heart and Lung Institute, Imperial College London, UK; British Heart Foundation Centre for Research Excellence and Centre for Regenerative Medicine, Imperial College London, UK                                                          |
| Jose      | Ordovas Montanes | Division of Gastroenterology Boston Children's Hospital, Boston, MA, USA; Program in Immunology, Harvard Medical School, Boston, MA, USA; Broad Institute of MIT and Harvard, Cambridge, MA, USA; Harvard Stem Cell Institute, Cambridge, MA, USA. |
| Gavin     | Oudit            | Canada Research Chair in Heart Failure, Division of Cardiology, 2C2 Walter Mackenzie Health Sciences Centre, Edmonton, Alberta, T6G 2B7, Canada                                                                                                    |
| Dana      | Pe'er            | Computational and Systems Biology Program, Sloan Kettering Institute, Memorial Sloan Kettering Cancer Center, New York, New York, USA                                                                                                              |
| Joseph    | Powell           | Garvan-Weizmann Centre for Cellular Genomics, Garvan Institute of Medical Research, Sydney, NSW, Australia; UNSW Cellular Genomics Futures Institute, University of New South Wales, Sydney, NSW, Australia                                        |

|              |                  |                                                                                                                                                                                                                                                        |
|--------------|------------------|--------------------------------------------------------------------------------------------------------------------------------------------------------------------------------------------------------------------------------------------------------|
| Steve        | Quake            | Depts of Bioengineering and Applied Physics, Stanford University, and the Chan Zuckerberg Biohub.                                                                                                                                                      |
| Jay          | Rajagopal        | Harvard Stem Cell Institute, Cambridge, Massachusetts; Center for Regenerative Medicine, Massachusetts General Hospital, Boston, Massachusetts                                                                                                         |
| Purushothama | Rao Tata         | Department of Cell Biology, Regeneration Next Initiative, Duke University School of Medicine, Durham, NC, USA, 27710                                                                                                                                   |
| Emma         | Rawlins          | Wellcome Trust/ CRUK Gurdon Institute and Department Physiology, Development and Neuroscience, University of Cambridge                                                                                                                                 |
| Aviv         | Regev            | Klarman Cell Observatory, Broad Institute of MIT and Harvard, Howard Hughes Medical Institute, Department of Biology, Massachusetts Institute of Technology, Cambridge MA 02142                                                                        |
| Paul         | Reyfman          | Northwestern University Feinberg School of Medicine, Division of Pulmonary and Critical Care Medicine                                                                                                                                                  |
| Mauricio     | Rojas            | Division of Pulmonary, Allergy and Critical Care Medicine, University of Pittsburgh                                                                                                                                                                    |
| Orit         | Rosenblatt-Rosen | Klarman Cell Observatory, Broad Institute of Harvard and MIT, Cambridge, MA 02142, USA                                                                                                                                                                 |
| Kourosh      | Saeb-Parsy       | Department of Surgery, University of Cambridge and NIHR Cambridge Biomedical Research Centre, UK                                                                                                                                                       |
| Christos     | Samakovlis       | SciLifeLab, Department of Molecular Biosciences, Stockholm University, Stockholm Sweden and Cardiopulmonary Institute, Justus Liebig University; Giessen Germany                                                                                       |
| Herbert      | Schiller         | Comprehensive Pneumology Center (CPC) / Institute of Lung Biology and Disease (ILBD), Helmholtz Zentrum München, Member of the German Center for Lung Research (DZL), Munich, Germany                                                                  |
| Joachim      | Schultze         | Department for Genomics & Immunoregulation, LIMES-Institute, University of Bonn, 53115 Bonn, Germany and 2 PRECISE Platform for Single Cell Genomics & Epigenomics, German Center for Neurodegenerative Diseases and University of Bonn, Bonn, Germany |
| Roland       | Schwarz          | Max Delbrück Center for Molecular Medicine, Berlin, DE                                                                                                                                                                                                 |
| Ayellet      | Segre            | Ocular Genomics Institute, Massachusetts Eye and Ear Infirmary, Boston, MA, USA 02114                                                                                                                                                                  |
| Max          | Seibold          | Department of Pediatrics; Center for Genes, Environment, and Health; National Jewish Health; Denver, CO 80206                                                                                                                                          |

|           |           |                                                                                                                                                                                                                                                                                                                                                   |
|-----------|-----------|---------------------------------------------------------------------------------------------------------------------------------------------------------------------------------------------------------------------------------------------------------------------------------------------------------------------------------------------------|
| Jon       | Seidman   | Department of Genetics, Harvard Medical School, Boston, MA 02115, USA                                                                                                                                                                                                                                                                             |
| Christine | Seidman   | Department of Genetics, Harvard Medical School, Boston, MA 02115, USA;<br>Cardiovascular Division, Brigham & Women's Hospital, Boston, MA 02115, USA; Howard Hughes Medical Institute                                                                                                                                                             |
| Alex      | Shalek    | Ragon Institute of MGH, MIT, and Harvard, Cambridge, MA, USA; Institute for Medical Engineering and Science (IMES), Koch Institute for Integrative Cancer Research, and Department of Chemistry, Massachusetts Institute of Technology, Cambridge, MA, USA; Broad Institute of MIT and Harvard, Cambridge, MA, USA                                |
| Douglas   | Shepherd  | Center for Biological Physics and Department of Physics, Arizona State University, Tempe, AZ USA                                                                                                                                                                                                                                                  |
| Jason     | Spence    | Department of Internal Medicine, Gastroenterology, University of Michigan Medical School, Ann Arbor, MI 48109, USA; Department of Cell and Developmental Biology, University of Michigan Medical School, Ann Arbor, MI 48109, USA; Department of Biomedical Engineering, University of Michigan College of Engineering, Ann Arbor, MI 48109, USA. |
| Avi       | Spira     | Department of Medicine, Boston University School of Medicine, Boston, MA, USA; Johnson & Johnson Innovation, Cambridge, MA, USA.                                                                                                                                                                                                                  |
| Xin       | Sun       | Department of Pediatrics, Department of Biological Sciences, University of California SD, 9500 Gilman Dr. MC0766, San Diego, CA 92093-0766                                                                                                                                                                                                        |
| Erik      | Sundström | Division of Neurodegeneration, Department of Neurobiology, Care Sciences and Society, Karolinska Institutet and Stiftelsen Stockholms Sjukhem, Stockholm, Sweden                                                                                                                                                                                  |
| Sarah     | Teichmann | Wellcome Sanger Institute, Wellcome Genome Campus, Hinxton, Cambridge, CB10 1SA, UK; Theory of Condensed Matter Group, Cavendish Laboratory/Department of Physics, University of Cambridge, Cambridge CB3 0HE, UK                                                                                                                                 |
| Fabian    | Theis     | Fabian J Theis, Institute of Computational Biology, Helmholtz Zentrum München and Departments of Mathematics and Life Sciences, Technical University Munich, Germany                                                                                                                                                                              |
| Alexander | Tsankov   | Genetics and Genomic Sciences, Icahn School of Medicine at Mount Sinai, New York, NY USA                                                                                                                                                                                                                                                          |
| Ludovic   | Vallier   | Wellcome and MRC Cambridge Stem Cell Institute, Jeffrey Cheah Biomedical Centre, Biomedical Campus, Puddicombe Way, Cambridge CB2 0AW, UK; Department of Surgery, Cambridge Biomedical Campus, Hills Rd, Cambridge, CB2 0QQ, UK                                                                                                                   |

|                  |               |                                                                                                                                                                                                                                                                                                                          |
|------------------|---------------|--------------------------------------------------------------------------------------------------------------------------------------------------------------------------------------------------------------------------------------------------------------------------------------------------------------------------|
| Maarten          | van den Berge | Department of Pulmonary diseases and tuberculosis, University of Groningen, GRIAC Research institute, University Medical Center Groningen, the Netherlands                                                                                                                                                               |
| Jeffrey          | Whitsett      | Cincinnati Children's Hospital Medical Center, Cincinnati, OHIO                                                                                                                                                                                                                                                          |
| Ramnik           | Xavier        | Department of Molecular Biology, Massachusetts General Hospital and Broad Institute                                                                                                                                                                                                                                      |
| Yan              | Xu            | Divisions of Pulmonary Biology and Biomedical Informatics; Perinatal Institute, Cincinnati Children's Hospital Medical Center; University of Cincinnati College of Medicine                                                                                                                                              |
| Laure Emmanuelle | Zaragosi      | Université Côte d'Azur, CNRS, IPMC, Sophia-Antipolis, 06560, France                                                                                                                                                                                                                                                      |
| Darin            | Zerti         | Biosciences Institute, Faculty of Medical Sciences, Newcastle University, International Centre for Life, Bioscience West Building, Newcastle upon Tyne NE1 3 BZ, UK; Microscopy Centre and Department of Applied Clinical Sciences and Biotechnology, University of L'Aquila, via Vetoio, 67100 Coppito, L'Aquila, Italy |
| Kun              | Zhang         | UCSD Department of Bioengineering, 9500 Gilman Drive, MC0412, PFBH402, La Jolla, CA 92093-0412                                                                                                                                                                                                                           |
| Hongbo           | Zhang         | Key Laboratory for Stem Cells and Tissue Engineering, Ministry of Education and Department of Histology and Embryology of Zhongshan School of Medicine, Sun Yat-Sen University, Guangzhou 510080, China                                                                                                                  |
